# Supplementary material for: Natural polymer-based bioabsorbable conducting wires for implantable bioelectronic devices
Source: Royal Society of Chemistry journal article supplement (doi:10.1039/d0ta09701b), 2020-01-01
Supplement: d0ta09701b1.pdf [file d0ta09701b1.pdf]

Electronic Supplementary Information

**Natural Polymer-Based Bioabsorbable Conducting Wires for Implantable  
Bioelectronic Devices**

Qianqian Niu, Xiangyu Huang, Shasha Lv, Xiang Yao, Suna Fan\*, Yaopeng Zhang\*

*State Key Laboratory for Modification of Chemical Fibers and Polymer Materials, Shanghai Belt  
and Road Joint Laboratory for Advanced Fiber and Low-Dimension Materials, College of  
Materials Science and Engineering, Donghua University, Shanghai, 201620, China*

Corresponding author: Yaopeng Zhang, Suna Fan

E-mail: zyp@dhu.edu.cn(Y.Z.), fsn@dhu.edu.cn (S.F.)

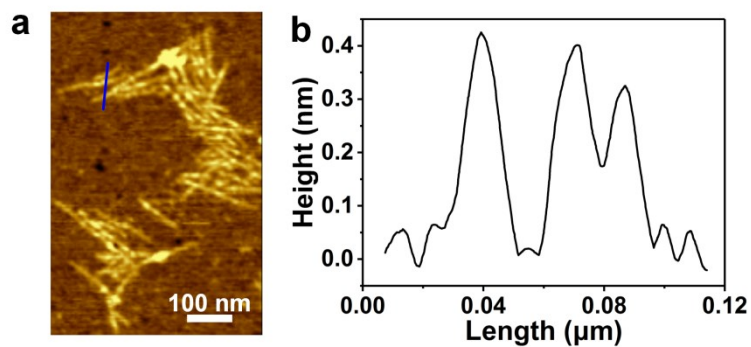

**Fig. S1** (a) AFM image and (b) height profile of SNRs derived from TEMPO/NaBr/NaClO solvent system containing 0.016 mol NaClO, 0.02 g TEMPO, and 0.1 g NaBr per gram of DS. The blue line in (a) was used to measure the (b) height of three SNRs.

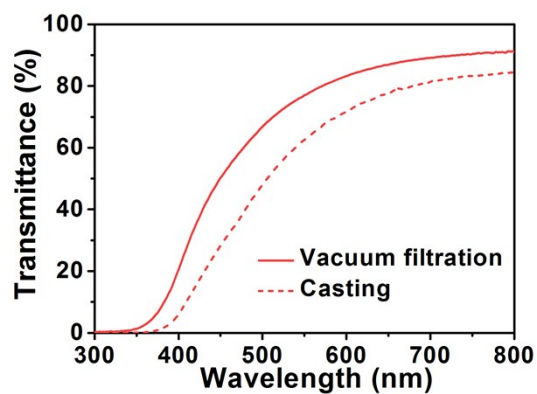

**Fig. S2** Comparison of UV-*vis* transmittance of S8K2 with a thickness of 45 μm prepared by casting and vacuum-filtration methods.

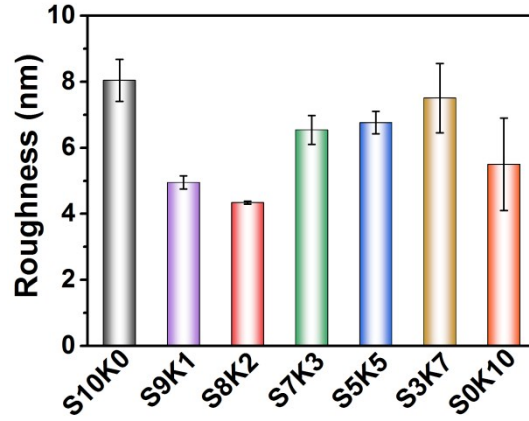

Fig. S3 Surface roughness of SKCFs with different mass ratios.

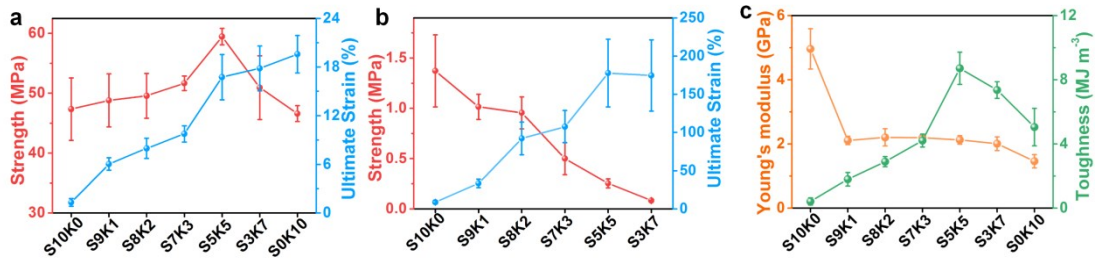

Fig. S4 Strength and elongation at break of SKCFs in (a) dry and (b) wet conditions. (c) Effect of SKCF mass ratios on Young's modulus and toughness of SKCFs in dry conditions.

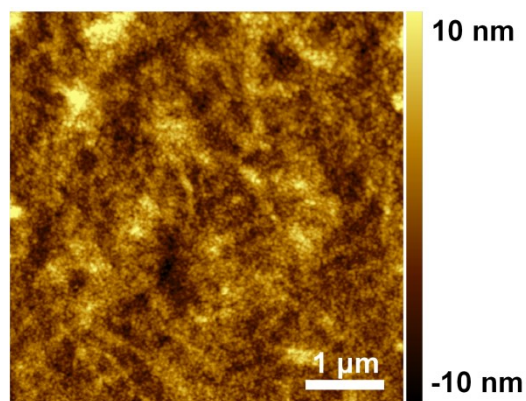

**Fig. S5** AFM image of the surface morphology of SKCF-Au wire.

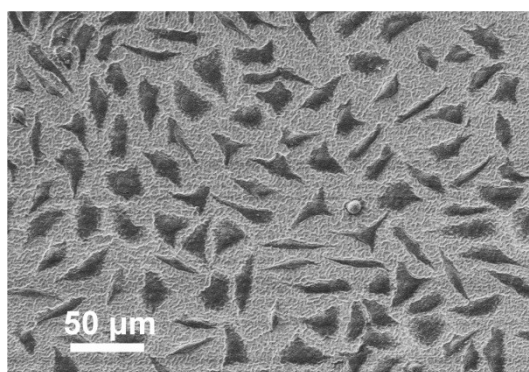

**Fig. S6** Representative scanning electron micrograph of L929 cells seeded on SKCF-Au film for 3 d.

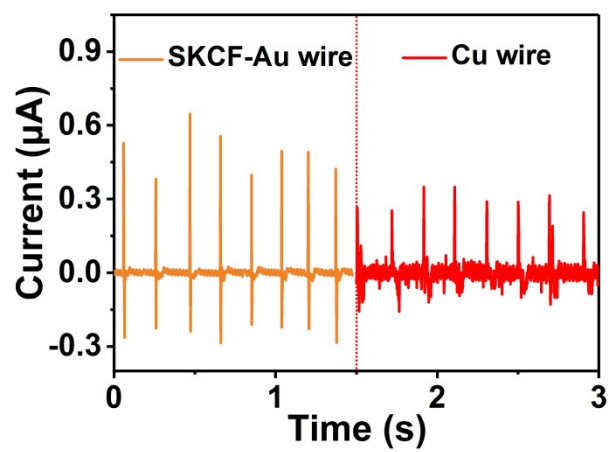

**Fig. S7** Output current of TENG using two kinds of conducting wire at a frequency of 4 Hz.

**Table S1** Comparison of the PD of the integrated energy generated device with that of other previously reported bio-based TENGs.

| Friction layer type | Materials               |                   |                     | PD (mW/m <sup>2</sup> ) | Biodegradable TENG | Conducting wire  | Biodegradable | Ref. |
|---------------------|-------------------------|-------------------|---------------------|-------------------------|--------------------|------------------|---------------|------|
|                     | Friction layer          | Conducting layer  | Encapsulation layer |                         |                    |                  |               |      |
| NP/SP               | Chitosan/Kapton         | Al                | ---                 | 0.0175                  | No                 | Copper electrode | No            | 1    |
|                     | CNF/FEP                 | ITO               | PET                 | 5600                    | No                 | Copper tapes     | No            | 2    |
|                     | PVA/SA                  | Al/Li             | Soluble tape        | 3.8                     | Yes                | Conductive tape  | No            | 3    |
|                     | RSSP/PET                | ITO               | ---                 | 1030                    | No                 | Metal wire       | No            | 4    |
|                     | RSSP/PET&PVDF           | ITO/Cu            | ---                 | 4016                    | No                 | Metal wire       | No            | 5    |
|                     | Leaf/PMMA               | Metal             | ---                 | 45                      | No                 | Metal electrode  | No            | 6    |
| SF/SP               | RSFF/PET                | ITO               | ---                 | 68                      | No                 | Metal wire       | No            | 7    |
|                     | ESM/PI                  | Al                | ---                 | 4.3                     | No                 | Metal wire       | No            | 8    |
|                     | RSFF/PET                | ITO               | ---                 | 1936                    | No                 | Metal wire       | No            | 9    |
|                     | ESM/PVA&MXene           | Al                | ---                 | 1087.6                  | No                 | Metal wire       | No            | 10   |
|                     | ESM/PCL&GO              | Au                | PCL                 | 72                      | Yes                | Metal wire       | No            | 11   |
|                     | ESM/PVDF                | Conductive fabric | ---                 | 3100                    | No                 | Metal wire       | No            | 12   |
|                     | RSFF/PTFE               | Al                | Acrylic substrate   | 22050                   | No                 | Metal wire       | No            | 13   |
|                     | Silk aerogel/PTFE       | ITO               | PET                 | 370                     | No                 | Aluminum strand  | No            | 14   |
| RSFF/PET            | ITO                     | Plastic casing    | 371.8               | No                      | Metal wire         | No               | 15            |      |
| NP/NP               | CCP/NCM                 | Copper foil       | Print paper         | 16100                   | No                 | Metal wire       | No            | 16   |
|                     | Calcium Alginate Nitro- | Al                | PLA                 | 10.6                    | No                 | Metal wire       | No            | 17   |
|                     | CNF/Methyl-CNF          | ITO               | PET                 | 640                     | No                 | Metal wire       | No            | 18   |
|                     | BNC                     | Copper foil       | PPF&POM             | 4.8                     | No                 | Metal wire       | No            | 19   |
|                     | Starch                  | Water film        | ---                 | 2.58                    | Yes                | Metallic wire    | No            | 20   |
|                     | Leaf/Liquid             | Cr/Au             | ---                 | 0.0024                  | Yes                | Metal wire       | No            | 21   |
| SF/NP               | RSFF                    | Mg                | RSFF                | 38.5                    | Yes                | Metal lead wire  | No            | 22   |
|                     | RSFF/Rice               | Mg                | RSFF                | 21.6                    | Yes                | Metal lead       | No            | 23   |

| paper     |       |      |       |     | wire            |     |  |              |
|-----------|-------|------|-------|-----|-----------------|-----|--|--------------|
| SNRF/ESM  | Mg/Al | RSFF | 102   | No  | Cu wire         | No  |  | 24           |
| SNRF/RSFF | Mg    | RSFF | 86.7  | Yes | Cu wire         | No  |  | 24           |
| SNRF/RSFF | Mg    | RSFF | 314.4 | Yes | SKCF-Au<br>wire | Yes |  | This<br>work |

Note: CNF (cellulose nanofibril), FEP (fluorinated ethylene propylene), PET (poly(ethyleneterephthalate)), PVA (polyvinyl alcohol), SA (alginate sodium), RSSP (recombinant spider silk proteins), PVDF (Poly(vinylidene fluoride)), PMMA (poly(methyl methacrylate)), ESM (electrospinning mat), PI (polyimide), RSFF (regenerated silk fibroin film), PCL (polycaprolactone), PTFE (polytetrafluoroethylene), ITO (indium tin oxide), CCP (crepe cellulose paper), NCM (nitrocellulose membrane), BNC (bacterial nanocellulose), PPF (polypropylene), POM (polyoxymethylene), PLA (polylactic acid), SNRF (silk nanoribbon film).

**Table S2** Comparison of the conducting wires.

| Type                       | Conductive material                           | Conductive material content | Other materials              | Conductive property                              | Biodegradability/working time | Ref.  |
|----------------------------|-----------------------------------------------|-----------------------------|------------------------------|--------------------------------------------------|-------------------------------|-------|
| Conventional metallic wire | Cu                                            | 100%                        | No                           | Resistivity $1.75 \times 10^{-8} \Omega \cdot m$ | No                            | ---   |
|                            | Al                                            | 100%                        | No                           | Resistivity $2.83 \times 10^{-8} \Omega \cdot m$ | No                            | ---   |
| Fiber-shaped wire          | Cu-CNT                                        | 100%                        | No                           | Resistivity $1.6 \times 10^{-7} \Omega \cdot m$  | No                            | 25    |
|                            | CNT-Au-Cu                                     | 100%                        | No                           | Conductivity $4.65 \times 10^5 S/cm$             | No                            | 26    |
|                            | Aligned CNT                                   | T=0.15-1.59 $\mu m$         | self-healing polymer         | Resistance $140 \Omega/cm$                       | No                            | 27    |
|                            | CNT                                           | ---                         | self-healing polymer         | Resistance $5.7 \times 10^3 \Omega/cm$           | No                            | 27    |
|                            | Ag nanowire                                   | ---                         | self-healing polymer         | Resistance $12 \Omega/cm$                        | No                            | 27    |
|                            | Ag-Au nanowire                                | ---                         | SBS elastomer                | Conductivity $4.2 \times 10^4 S/cm$              | No                            | 28    |
| Biodegradable metals       | Silver nanowire                               | 30 $\mu m$                  | PET fibers                   | Resistivity $1.62 \times 10^{-8} \Omega \cdot m$ | No                            | 29    |
|                            | Mg, Mg-Ca, Mg-Zn, Mg-Si, Mg-Sn, Mg-Zr, Mg-Al, | 100%                        | No                           | ---                                              | Yes                           | 30-32 |
|                            | Fe, Fe-Mn,                                    | 100%                        | No                           | ---                                              | Yes                           | 32    |
|                            | Zn, Ca, Sr                                    | 100%                        | No                           | ---                                              | Yes                           | 32    |
|                            | Mg                                            | T=7.5 $\mu m$               | poly(DTE carbonate), and PCL | Resistance $1 \Omega/cm$                         | Yes/7 d                       | 33    |
| PEDOT:PSS                  | D=48 $\mu m$                                  | RSF                         | Conductivity $138 S/cm$      | Yes/7 d                                          | 34                            |       |
| Cr/Au                      | T=150 nm                                      | SKCF                        | Resistance $8 \Omega/cm$     | Yes/10 d                                         | This work                     |       |

Note: CNT (carbon nanotube), PET (poly(ethyleneterephthalate)), PCL (polycaprolactone), RSF (regenerated silk fibroin), SBS (poly(styrene-butadiene-styrene)), PET (poly(ethyleneterephthalate)), PEDOT:PSS (poly(3,4-ethylenedioxythiophene) : poly(styrenesulfonate)), poly(DTE carbonate) (poly(desamino tyrosyl-tyrosine ethyl ester carbonate)), RSF (regenerated silk fibroin). "T"=thickness, "D"=diameter.



## References

- 1 R. Wang, S. Gao, Z. Yang, Y. Li, W. Chen, B. Wu and W. Wu, *Adv. Mater.*, 2018, **30**, 1706267.
- 2 C. Yao, A. Hernandez, Y. Yu, Z. Cai and X. Wang, *Nano Energy*, 2016, **30**, 103-108.
- 3 Q. Liang, Q. Zhang, X. Yan, X. Liao, L. Han, F. Yi, M. Ma and Y. Zhang, *Adv. Mater.*, 2017, **29**, 1604961.
- 4 Y. Zhang, Z. Zhou, L. Sun, Z. Liu, X. Xia and T. H. Tao, *Adv. Mater.*, 2018, **30**, 1805722.
- 5 T. Huang, Y. Zhang, P. He, G. Wang, X. Xia, G. Ding and T. H. Tao, *Adv. Mater.*, 2020, **32**, 1907336.
- 6 Y. Jie, X. Jia, J. Zou, Y. Chen, N. Wang, Z. L. Wang and X. Cao, *Adv. Energy Mater.*, 2018, **8**, 1703133.
- 7 C. Liu, J. Li, L. Che, S. Chen, Z. Wang and X. Zhou, *Nano Energy*, 2017, **41**, 359-366.
- 8 H.-J. Kim, J.-H. Kim, K.-W. Jun, J.-H. Kim, W.-C. Seung, O. H. Kwon, J.-Y. Park, S.-W. Kim and I.-K. Oh, *Adv. Energy Mater.*, 2016, **6**, 1502329.
- 9 X.-S. Zhang, J. Brugger and B. Kim, *Nano Energy*, 2016, **20**, 37-47.
- 10 C. Jiang, C. Wu, X. Li, Y. Yao, L. Lan, F. Zhao, Z. Ye, Y. Ying and J. Ping, *Nano Energy*, 2019, **59**, 268-276.
- 11 S. Parandeh, M. Kharaziha, F. Karimzadeh and F. Hosseinabadi, *Nanotechnology*, 2020, **31**, 385402.
- 12 Y. Guo, X.-S. Zhang, Y. Wang, W. Gong, Q. Zhang, H. Wang and J. Brugger, *Nano Energy*, 2018, **48**, 152-160.
- 13 B. Dudem, R. D. I. G. Dharmasena, S. A. Graham, J. W. Leem, H. Patnam, A. R. Mule, S. R. P. Silva and J. S. Yu, *Nano Energy*, 2020, **74**, 104882.
- 14 H.-Y. Mi, H. Li, X. Jing, P. He, P.-Y. Feng, X. Tao, Y. Liu, C. Liu and C. Shen, *Ind. Eng. Chem. Res.*, 2020, **59**, 12399-12408.
- 15 C. Liu, Y. Wang, N. Zhang, X. Yang, Z. Wang, L. Zhao, W. Yang, L. Dong, L. Che, G. Wang and X. Zhou, *Nano Energy*, 2020, **67**, 104228.
- 16 S. Chen, J. Jiang, F. Xu and S. Gong, *Nano Energy*, 2019, **61**, 69-77.
- 17 Y. Pang, F. Xi, J. Luo, G. Liu, T. Guo and C. Zhang, *RSC Advances*, 2018, **8**, 6719-6726.
- 18 C. Yao, X. Yin, Y. Yu, Z. Cai and X. Wang, *Adv. Funct. Mater.*, 2017, **27**, 1700794.
- 19 H.-J. Kim, E.-C. Yim, J.-H. Kim, S.-J. Kim, J.-Y. Park and I.-K. Oh, *Nano Energy*, 2017, **33**, 130-137.
- 20 Z. Zhu, K. Xia, Z. Xu, H. Lou and H. Zhang, *Nanoscale Res. Lett.*, 2018, **13**, 365.
- 21 D. Choi, D. W. Kim, D. Yoo, K. J. Cha, M. La and D. S. Kim, *Nano Energy*, 2017, **36**, 250-259.
- 22 Y. Zhang, Z. Zhou, Z. Fan, S. Zhang, F. Zheng, K. Liu, Y. Zhang, Z. Shi, L. Chen, X. Li, Y. Mao, F. Wang, Y. L. Sun and T. H. Tao, *Small*, 2018, **14**, 1802050.
- 23 W. Jiang, H. Li, Z. Liu, Z. Li, J. Tian, B. Shi, Y. Zou, H. Ouyang, C. Zhao, L. Zhao, R. Sun, H. Zheng, Y. Fan, Z. L. Wang and Z. Li, *Adv. Mater.*, 2018, **30**, 1801895.
- 24 Q. Niu, L. Huang, S. Lv, H. Shao, S. Fan and Y. Zhang, *Nano Energy*, 2020, **74**, 104837.
- 25 R. Sundaram, T. Yamada, K. Hata and A. Sekiguchi, *Sci. Rep.*, 2017, **7**, 9267.
- 26 T. Q. Tran, J. K. Y. Lee, A. Chinnappan, W. A. D. M. Jayathilaka, D. Ji, V. V. Kumar and S. Ramakrishna, *J. Mater. Sci. Technol.*, 2020, **40**, 99-106.
- 27 H. Sun, X. You, Y. Jiang, G. Guan, X. Fang, J. Deng, P. Chen, Y. Luo and H. Peng, *Angew.*

- Chem. Int. Ed. Engl.*, 2014, **53**, 9526-9531.
- 28 S. Choi, S. I. Han, D. Jung, H. J. Hwang, C. Lim, S. Bae, O. K. Park, C. M. Tschabrunn, M. Lee, S. Y. Bae, J. W. Yu, J. H. Ryu, S. W. Lee, K. Park, P. M. Kang, W. B. Lee, R. Nezafat, T. Hyeon and D. H. Kim, *Nat. Nanotechnol.*, 2018, **13**, 1048-1056.
- 29 K.-Y. Choi, Y.-R. Eo, K. Kim, H. Lee and J. Kim, *Fiber Polym.*, 2013, **14**, 1556-1561.
- 30 B. H. Li, K. Yang and X. Wang, *Neural Regen. Res.*, 2016, **11**, 2012-2017.
- 31 M. Haghshenas, *J. Magnes. Alloy.*, 2017, **5**, 189-201.
- 32 Y. F. Zheng, X. N. Gu and F. Witte, *Mat. Sci. Eng. R*, 2014, **77**, 1-34.
- 33 A. Palmroth, T. Salpavaara, I. Lyyra, M. Kroon, J. Lekkala and M. Kellomäki, *ACS Biomater. Sci. & Eng.*, 2018, **5**, 1134-1140.
- 34 Y. Jiang, M. Xu and V. K. Yadavalli, *Biosensors*, 2019, **9**, 103.
